# Supplementary material for: Photosynthetic growth despite a broken Q-cycle
Source: PubMed Central journal article supplement — Nat Commun. 2011 May 10;2:301–. doi: 10.1038/ncomms1299 (PMC3112540; doi:10.1038/ncomms1299), 2011-05-10
Supplement: ncomms1299-s1.pdf [file ncomms1299-s1.pdf]

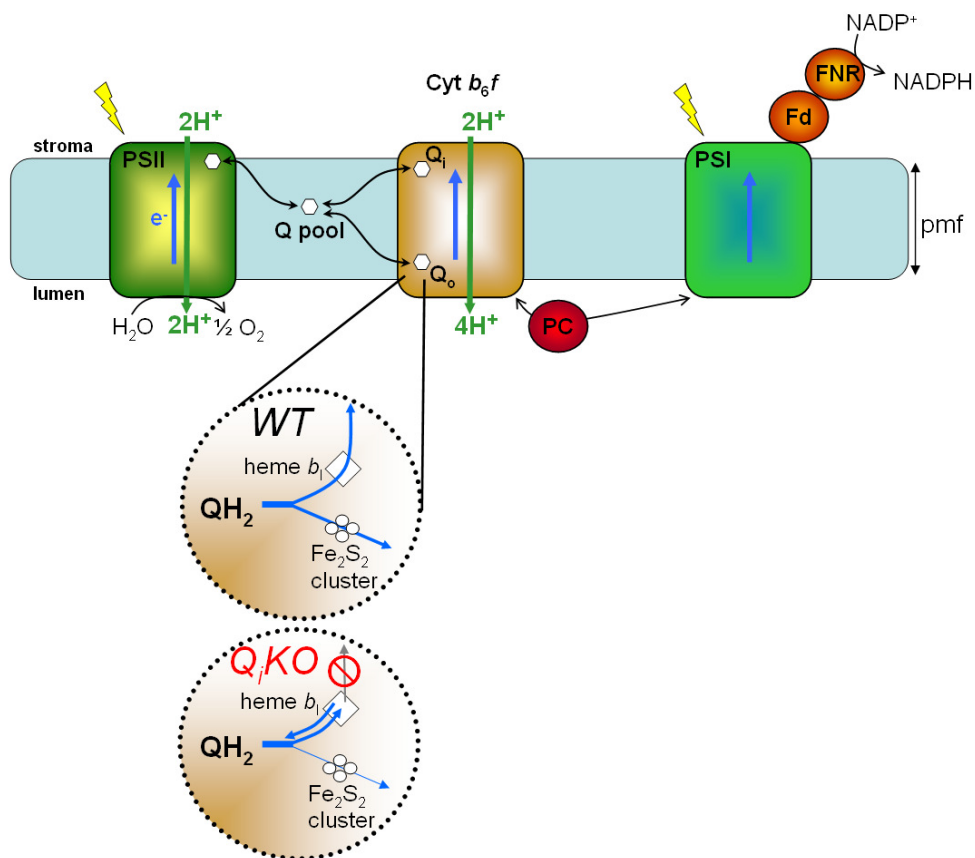

**Supplementary Figure S1 | A schematic representation of the photosynthetic chain.** The light-induced charge separation occurs in Photosystems I and II, triggering the turnover of the cytochrome  $b_6f$  complex which acts as a quinol plastocyanin oxidoreductase, which contributes, via the Q-cycle, to building up the proton motive force (pmf). As indicated,  $6\text{H}^+$  are translocated per 2 electrons transferred from water to  $\text{NADP}^+$ . (Plastocyanin (PC), Ferredoxin (Fd), Ferredoxin NADP Reductase (FNR)). As highlighted, this process involves the bifurcated electron transfer (blue arrows) from the quinol ( $\text{QH}_2$ ) to the  $\text{Fe}_2\text{S}_2$  cluster, on the one hand, and to the heme  $b_1$  on the other hand. This bifurcated electron transfer step is widely considered as being mechanistically mandatory and thus expected to be impeded when the heme  $b_1$  is not available as an electron acceptor. The inactivation of the  $\text{Q}_i$  site in the  $\text{Q}_i\text{KO}$  case promotes this situation yet the present finding that the strain bearing this mutation can grow phototrophically reveals that the blockage can be alleviated.

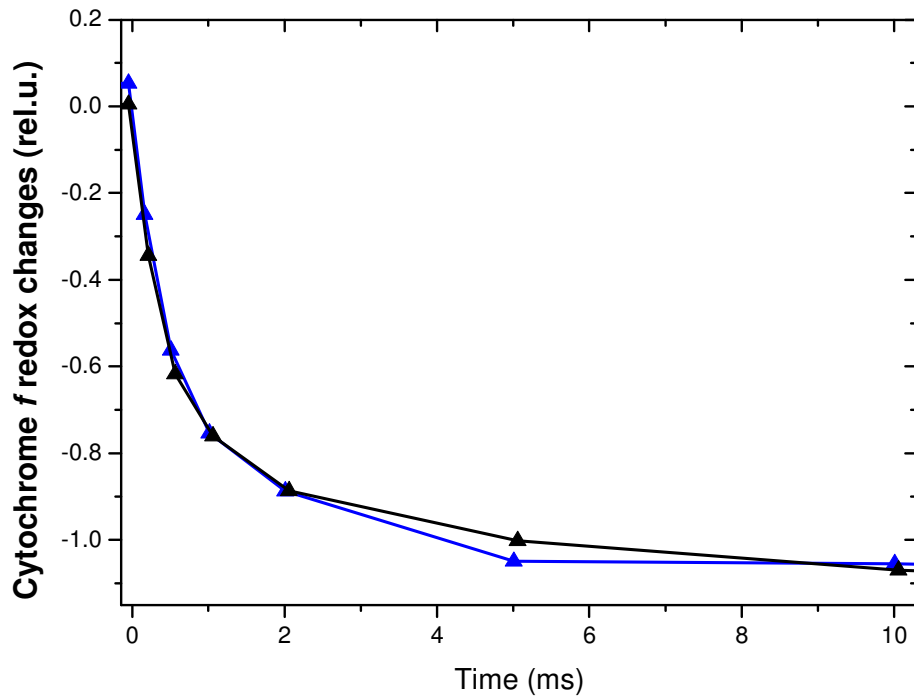

**Supplementary Figure S2 | Light-induced redox changes of cytochrome *f*.** Signal at 554 nm with a baseline drawn between 546 and 573 nm. The two kinetics were normalized on the PSI amount. Black, *WT*; Blue, *QiKO*. Cytochrome *f* oxidation in the presence of 100  $\mu$ M TDS.

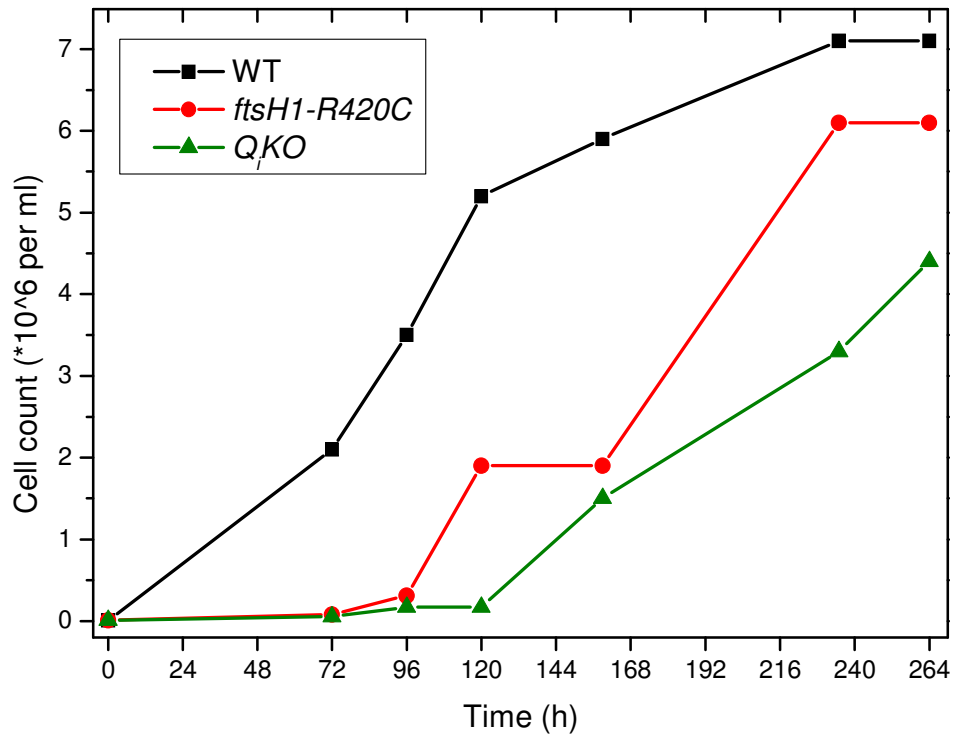

**Supplementary Figure S3 | Phototrophic growth of the WT, *Q;KO* and *ftsH1-R420C* strains in anaerobic conditions.** Cell growth curves of WT (black squares), *ftsH1-R420C* (red circles), *Q;KO* (green triangles) in minimal medium under  $40 \mu\text{E}\cdot\text{m}^{-2}\cdot\text{s}^{-1}$  of light and bubbled with a controlled atmosphere of 2%  $\text{CO}_2$  and 98%  $\text{N}_2$ . Cells grown in heterotrophy were inoculated in 500 ml minimal medium at a concentration of  $10^4$  cells $\cdot\text{ml}^{-1}$ . The cell density was determined by using a Malassez counting chamber. As the *Q;KO* strain results from the combination of the *petB-H202Q* and *ftsH1-R420C* mutations, its growth behavior should be compared to that of the *ftsH1-R420C* strain rather than to that of the WT. Both the *ftsH1-R420C* and *Q;KO* strains showed a similar lag phase, after which the growth rate of the latter was slightly slower than that of the former.

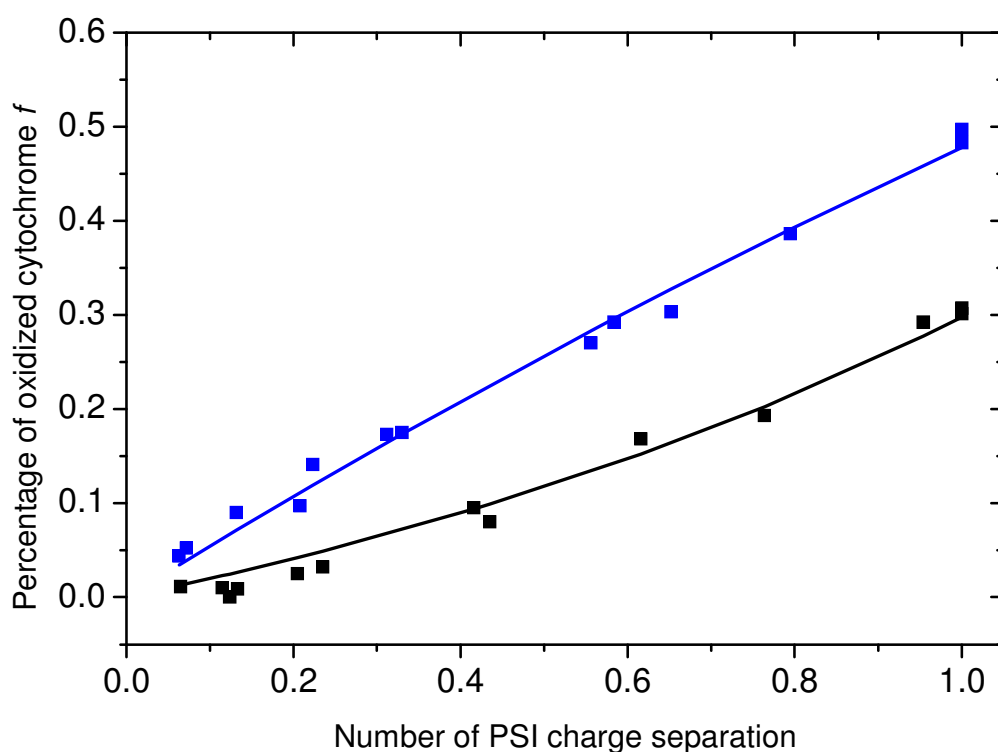

**Supplementary Figure S4 | DNP-INT enables Rieske  $\text{Fe}_2\text{S}_2$  protein movement while preventing quinol binding and oxidation in  $\text{Q}_0$  site.** The figure shows the relative efficiency of the light-induced oxidation of cytochrome *f* as a function of the amount of light-induced charge separation in Photosystem I. Blue, TDS (20  $\mu\text{M}$ ); Black, DNP-INT (20  $\mu\text{M}$ ). Whereas both inhibitors prevent the oxidation of a quinol at the  $\text{Q}_0$  site, the amount of oxidized cytochrome *f* is lower in the presence of DNP-INT than of TDS. The latter is known to lock the head of the Rieske protein in the so-called proximal configuration<sup>37</sup> thereby preventing electron transfer between its  $\text{Fe}_2\text{S}_2$  cluster and cytochrome *f*. The lower cytochrome *f* oxidation yield observed in the presence of DNP-INT shows that, at variance with TDS, this inhibitor allows the redox equilibration between the Rieske protein and cytochrome *f* and thus does not prevent the Rieske head movement.

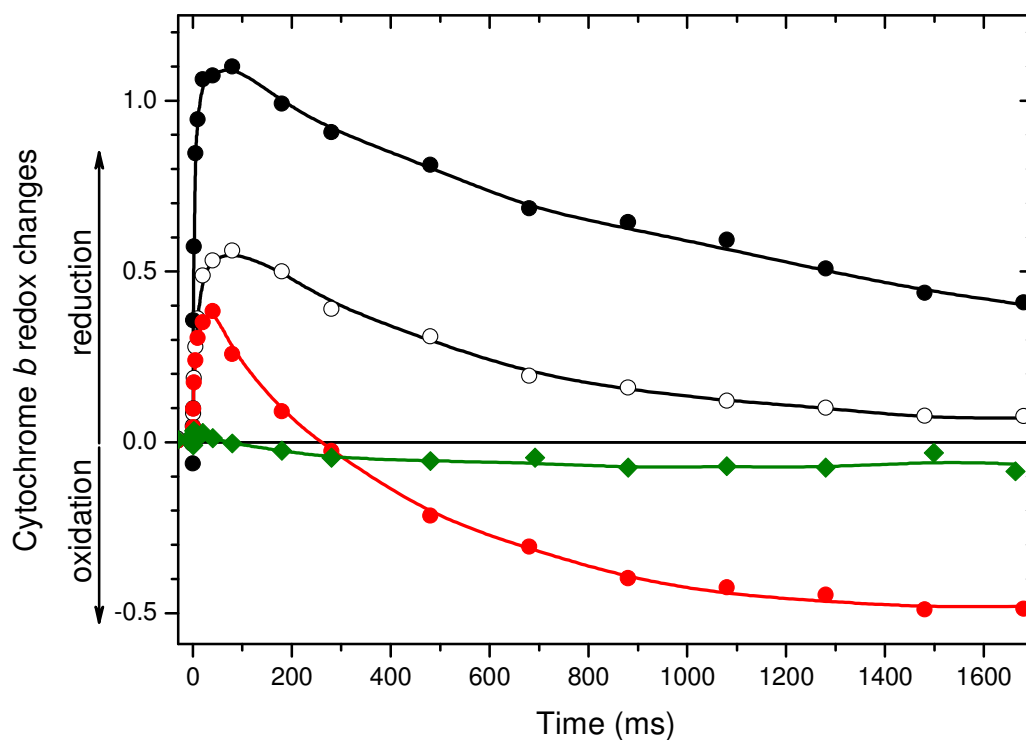

**Supplementary Figure S5 | DNP-INT inhibits the oxidation of  $b_1$ .** Light-induced redox kinetics of cytochrome  $b$  at 564 nm with a baseline drawn between 546 and 573 nm in  $Q_iKO$ . Black, filled symbols, mildly reducing conditions; open symbols, after preillumination to get similar contents of pre-reduced and pre-oxidized heme  $b$ ; Red, strongly reducing conditions. Green, DNP-INT (20  $\mu$ M) in strongly reducing conditions. As expected by its quinone analog nature<sup>38</sup>, DNP-INT inhibits reduction of heme  $b_1$  but also prevents the reoxidation of pre-reduced heme  $b_1$ . Since DNP-INT does not impede the Rieske protein movement (Supplementary Fig. S4), this demonstrates that reoxidation of heme  $b_1$  does not occur through the Rieske protein but rather via the reduction of the semiquinone intermediate.

## Supplementary References

37. Zhang, Z. et al., Electron transfer by domain movement in cytochrome *bc*<sub>1</sub>. *Nature* **392**, 677-684 (1998).
38. Delosme, R., Joliot, P., and Trebst, A., Flash-induced oxidation of cytochrome *b*<sub>563</sub> in algae under anaerobic conditions - Effect of Dinitrophenylether of iodonitrothymol. *Biochim Biophys Acta* **893**, 1-6 (1987).
